# Supplementary material
Source: MDPI journal article supplement (https://www.mdpi.com/2075-4701/13/8/1413)
Supplement: s1 [file s1]

Archive with 2 entries (2 files):
- metals-2521359- supplementary material.pdf
- S4-Video.mp4
